# The Differential Roles of the Adaptor Proteins Nck1 and Nck2 in Shear Stress-Induced Endothelial Activation.

Mabruka Alfaidi<sup>1</sup>, Christina H. Acosta<sup>3</sup>, Jessica M. Lindquist<sup>1</sup>, Elizabeth D. Cockerham<sup>1</sup>, and A. Wayne Orr<sup>1,2,3,4</sup>.

<sup>1</sup>Department of Pathology and Translational Pathobiology, <sup>2</sup>Department of Molecular & Cellular Physiology, <sup>3</sup>Department of Cell Biology and Anatomy, <sup>4</sup>Center for Cardiovascular Diseases and Sciences, LSU Health - Shreveport, Shreveport, LA, USA.

**Short title:** Nck1 effects in atherogenic endothelial activation.

Subject: *Vascular Disease*

**<sup>4</sup>Corresponding author:**

A. Wayne Orr  
Department of Pathology  
1501 Kings Hwy  
Biomedical Research Institute, Rm. 6-21  
LSU Health Sciences Center – Shreveport  
Shreveport, LA 71130  
Office: (318) 675-5462  
Fax: (318) 675-8144  
[aorr@lsuhsc.edu](mailto:aorr@lsuhsc.edu)

Total Word count: 3889

Total no of figures: 8.

No of references: 29

1 **ABSTRACT:**

2 **Background:** Hemodynamic shear stress critically regulates endothelial activation and  
3 atherogenesis by affecting cytoskeletal dynamics and endothelial gene expression. The Nck  
4 adaptor proteins (Nck1 and Nck2) regulate cytoskeletal remodeling pathways and play redundant  
5 roles during development. While a cell permeable Nck-binding peptide reduces shear-induced  
6 inflammation, the roles of Nck1 and Nck2 in atherosclerosis remain unknown.

7 **Methods and Results:** Herein, we show that Nck1 deficiency (siRNA/shRNA knockdown, genetic  
8 knockout), but not Nck2, decreases basal and shear stress-induced proinflammatory signaling  
9 (NF- $\kappa$ B phosphorylation and nuclear translocation) and ICAM-1/VCAM-1 expression. In contrast,  
10 neither Nck1 nor Nck2 were required for flow-induced Akt and ERK1/2 activation, and only Nck2  
11 was required for laminar flow-induced cytoskeletal alignment. Using the partial carotid ligation  
12 model of disturbed flow, we found that Nck1 knockout mice showed significantly reduced  
13 proinflammatory gene expression and macrophage infiltration that was not further diminished  
14 upon Nck2 deletion. Consistent with these findings, Nck1 knockout mice showed significantly  
15 diminished diet-induced atherosclerosis, associated with reduced plasma cytokine levels and  
16 diminished macrophage content. To define the mechanisms of differential Nck1 and Nck2  
17 signaling in endothelial activation, we performed domain swap experiments mixing SH2 and SH3  
18 domains between Nck1 and Nck2. These Nck1/Nck2 chimeras define a critical role for the Nck1  
19 SH2 domain (phosphotyrosine binding) but a redundant role for Nck1/2 SH3 domains (proline rich  
20 binding) in rescuing shear stress-induced endothelial activation in Nck1/2 DKO cells. Using  
21 domain point mutations, we confirmed the vital role for Nck1's SH2 domain and identify the first  
22 Nck SH3 domain (DY pocket containing domain) in mediating NF- $\kappa$ B activation and endothelial  
23 inflammation. Pre-treatment of endothelial cells with the small molecule Nck1 SH3.1 inhibitor

24 confirmed the critical role of this domain in flow-induced NF- $\kappa$ B activation and ICAM-1/ VCAM-1  
25 expression.  
26 **Conclusions:** Taken together, our data reveal a hitherto unknown link between Nck1 signaling in  
27 endothelial cell activation and atherosclerosis development, highlighting the potential for targeting  
28 Nck1 to control atherogenic inflammation.

## 29 INTRODUCTION

30 Atherosclerosis, a chronic lipid-driven arterial inflammatory disease, develops at sites of local  
31 endothelial activation, a proinflammatory shift in endothelial cell phenotype. Local hemodynamic  
32 shear stress confers protection or susceptibility to endothelial activation, with atheroprotective  
33 laminar flow limiting endothelial activation and atheroprone disturbed flow stimulating endothelial  
34 activation, characterized by cytoskeletal remodeling, endothelial stiffening, and nuclear factor- $\kappa$ B  
35 (NF- $\kappa$ B)-driven proinflammatory gene expression<sup>1-3</sup>. Activated endothelial cells recruit monocytes  
36 from the circulation, and in the context of hypercholestermia, these monocytes accumulate lipid  
37 to drive early fatty streak formation<sup>4</sup>. Recruitment of smooth muscle cells from the underlying  
38 media contribute to plaque formation and drive the production of a collagen-rich protective fibrous  
39 cap that limits plaque vulnerability to rupture<sup>5</sup>. While recent results from the CANTOS trial highlight  
40 the important role of limiting inflammation in the treatment of atherosclerosis<sup>6</sup>, our understanding  
41 of the mechanisms regulating flow-induced endothelial activation remain limited.

42 The Nck family of adaptor proteins (Nck1 and Nck2) are ubiquitously expressed and share  
43 approximately 68% amino acids identity<sup>7</sup>. Nck adaptor proteins lack enzymatic activity but control  
44 the formation of signaling complexes through three tandem Src homology 3 (SH3) domains and  
45 one C-terminal SH2 domain<sup>8</sup>. SH2 domains bind with high affinity to tyrosine phosphorylated  
46 proteins, whereas the SH3 domains bind to proline-rich sequences (PXXP) in signaling partners,  
47 suggesting that Nck serves to couple tyrosine kinase signaling to the activation of downstream  
48 pathways<sup>9</sup>. The two highly similar Nck proteins (Nck1 and Nck2) are expressed by different genes<sup>9</sup>  
49 that play redundant roles during development, as deletion of both Nck isoforms results in an  
50 embryonic lethal phenotype due to impaired vasculogenesis while deletion of only one isoform  
51 did not<sup>7</sup>. While Nck1 and Nck2 play redundant roles in regulating angiogenesis in mouse models  
52 of retinopathy<sup>10</sup>, Nck2 may play a dominant role in PDGF-induced actin polymerization in NIH3T3

53 cells<sup>11</sup>. In contrast, Nck1 plays a more dominant role in T cell receptor-induced ERK activation<sup>12</sup>,  
54 suggesting non-compensating roles during phenotypic regulation post-development. However,  
55 the signaling effects of Nck1/2 outside the context of cytoskeleton remodeling are incompletely  
56 understood.

57 We previously have shown that pretreatment of endothelial cells with a membrane-permeable  
58 peptide corresponding to a Nck-binding PXXP sequence significantly reduced inflammation and  
59 vascular permeability in atherosclerosis<sup>13</sup>, suggesting that Nck may regulate endothelial activation  
60 by flow. However, these studies cannot exclude the possibility of off-target interactions between  
61 this peptide and other SH3 containing adaptor proteins. Also, it cannot definitely prove that the  
62 anti-inflammatory effects observed *in vivo* are indeed due to direct inhibition of endothelial Nck<sup>14</sup>.  
63 The roles of Nck1/2 in atherogenic endothelial activation and the specific roles of Nck1 and Nck2  
64 remain to be determined. Here we utilized both cell culture and animal models of disturbed blood  
65 flow and atherosclerosis to define the signaling roles of Nck1 and Nck2 in shear stress-induced  
66 endothelial activation.

## 67 **METHODS.**

68 The authors declare that all the data supporting the current study are either available within the  
69 article or online data supplements. All reagents were provided from Gibco, USA, unless otherwise  
70 stated. All lentiviral vectors were designed and obtained using the VectorBuilder website, and  
71 site-directed mutagenesis performed by the COBRE Redox Molecular Signaling Core.

### 72 **Cell culture:**

73 Nck1/2 were knocked down in human aortic endothelial cells (HAECs) using either SMARTPool  
74 siRNA (Dharmacon<sup>TM</sup>) or shRNA (pLV-(shRNA)-mCherry:T2A:Puro-U6 (Nck1 target seq:  
75 GGGTTCTCTGTCAGAGAAA; Nck2 target seq: CTAAAGCGTCAGGGAAGA)) with 3<sup>rd</sup>

76 generation lenti components provided from Addgene; pMD2.G (#12259), pRSV-Rev (#12253),  
77 pMDLg/pRRE (#12251). To knock out Nck1/2 in HAECs, CRISPR-Cas9 was used. The dual-  
78 guide RNA (sgRNA) sequences targeting Nck1/2 genes were as following: Nck1:  
79 GTCGTCAATAACCTAAATAC; Nck2: TGACGCGCGACCCCTTCACC; Scrambled sgRNA:  
80 GCACTACCAGAGCTAACTCA. Mouse aortic endothelial cells (MAECs) were isolated from the  
81 Nck1 knockout and Nck2 knockout mice as previously described<sup>15</sup>. Endothelial cells were either  
82 exposed to acute onset shear stress or chronic laminar and oscillatory shear stress (model of  
83 disturbed flow) as we previously described<sup>16</sup>.

#### 84 **Animal Studies:**

85 The LSU Health - Shreveport Institutional Animal Care and Use Committee has approved the  
86 experiments used in this study. Mice containing global Nck1 knockout (Nck1<sup>-/-</sup>) and conditional  
87 Nck2 knockout (Nck2<sup>fl/fl</sup>) alleles were a gift from the late Tony Pawson (Samuel Lunefeld Research  
88 Institute), whereas mice that contained tamoxifen-inducible endothelial-specific Cre recombinase  
89 (VE-Cadherin-CreERT2) were kindly provided from Dr Luisa Iruela-Arispe, (UCLA). Mice were  
90 crossed with ApoE<sup>-/-</sup> and bred in house. All mice were backcrossed onto a C57Bl/6J background  
91 for at least 10 generations. Male mice at 8-9-weeks of age were intraperitoneally injected with  
92 Tamoxifen (1mg/kg, Sigma, St Louis, MO) for five consecutive days to induce CreERT2 nuclear  
93 translocation and gene excision. After 2 week recovery, the four groups of animals, including the  
94 inducible and endothelial specific (iEC) control (iEC-Control; ApoE<sup>-/-</sup>, VE-cadherin CreERT2<sup>tg/?</sup>)  
95 Nck1 knockout (Nck1 KO; ApoE<sup>-/-</sup>, VE-cadherin CreERT2<sup>tg/?</sup>, Nck1<sup>-/-</sup>), iEC-Nck2 knockout (iEC-  
96 Nck2 KO; ApoE<sup>-/-</sup>, VE-cadherin CreERT2<sup>tg/?</sup>, Nck2<sup>fl/fl</sup>), and the iEC-Nck1/2 double knockout (iEC-  
97 Nck1/2 DKO; ApoE<sup>-/-</sup>, VE-cadherin CreERT2<sup>tg/?</sup>, Nck2<sup>fl/fl</sup>, Nck1<sup>-/-</sup>) were either subjected to partial  
98 carotid ligation (PCL) surgery as we previously reported<sup>17</sup> or fed high fat diet (TD 88137, Harlan-  
99 Teklad, Madison, WI) for 12 weeks to induce spontaneous atherosclerosis.

100 **Statistical Analysis:**

101 Data are analyzed as mean  $\pm$  standard error of the mean (SEM) using GraphPad prism software  
102 (Version 7, GraphPad, San Diego, CA). Data was first tested for the Normality using Kolmogorvo-  
103 Smirnov test and then for multiple comparisons, 1-Way ANOVA followed by Tukey's post-test or  
104 2-Way ANOVA and Bonferroni's post-test was performed for the normally distributed data.  
105 Statistical significance was achieved when  $p < 0.05$ .

106 **RESULTS.**

107 *Nck1/2 deletion and their effects on shear stress-induced endothelial activation.*

108 To investigate the direct roles of Nck1/2 in shear stress induced endothelial activation, we adopted  
109 a loss of function model where the cellular levels of Nck1 and Nck2 were reduced by transfection  
110 with specific siRNA oligonucleotides. The efficiency of transfection was confirmed using Western  
111 blotting, with a 70% knockdown of Nck1 and 84% knockdown of Nck2 (**Figure 1A**). Endothelial  
112 cells were subjected to acute shear stress for 5, 15, or 30 minutes or maintained as a static  
113 control, and NF- $\kappa$ B activation was assessed by measuring p65 S536 phosphorylation or nuclear  
114 translocation. Nck1/2 knockdown cells showed a significant reduction in both NF- $\kappa$ B  
115 phosphorylation (**Figure 1B-C**) and NF- $\kappa$ B nuclear translocation ( $55 \pm 7.8\%$  vs.  $13 \pm 1.4\%$ ,  
116  $p < 0.0001$ ) (**Figure 1D-E**). To confirm the combined effect of Nck1/2 knockdown, we used  
117 CRISPR/Cas9 editing to generate a stable HAEC line lacking in both Nck1 and Nck2. Nck1/2  
118 double knock out cells (Nck1/2 DKO) show a similar decrease in shear-induced NF- $\kappa$ B  
119 phosphorylation (**Figure 1F-G**) and nuclear translocation (**Figure 1H-I**) compared to scrambled  
120 controls (**Figure 1I**). Similar results were also observed in mouse aortic endothelial cells (MAECs)  
121 isolated from iEC-Nck1/2 DKO mice (**Supplemental Figure I**).

122 In response to chronic oscillatory shear stress (OSS), NF- $\kappa$ B activation drives proinflammatory  
123 gene expression, including ICAM-1 and VCAM-1<sup>18</sup>. We found that siRNA-mediated Nck1/2  
124 depletion reduced oscillatory shear stress-induced VCAM-1 and ICAM-1 protein expression  
125 **(Figure 2A/B)**. Compared to the mock controls, Nck1/2 siRNA depleted cells showed significantly  
126 less NF- $\kappa$ B activation **(Figure 2B)** and mRNA expression of ICAM-1 and VCAM-1 **(Figure 2C)**.  
127 Shear-induced expression of the atheroprotective gene KLF2 was not affected by Nck1/2  
128 knockdown. Consistent with these data, Nck1/2 DKO endothelial cells show a similar reduction in  
129 oscillatory shear stress-induced NF- $\kappa$ B activation **(Figure 2D/E)** and VCAM-1/ICAM-1 expression  
130 **(Figure 2D-F)**. Taken together, these data suggest that Nck1/2 expression is required for NF- $\kappa$ B  
131 activation and proinflammatory gene expression associated with atheroprone hemodynamics.

132 *Deletion of Nck1, but Not Nck2, ameliorates shear stress-induced endothelial activation.*

133 Even though they are expressed by different genes, Nck1 and Nck2 proteins share a high  
134 sequence identity (68% overall)<sup>8</sup> and their functions are generally regarded as overlapping<sup>19</sup>.  
135 However, emerging evidence has suggested the independent contribution of the two isoforms in  
136 a variety of responses, including T cell activation, cytokinesis, and podocyte cytoskeletal  
137 dynamics<sup>20-22</sup>. To investigate the selective roles of Nck1 and Nck2, we utilized Nck1 and Nck2  
138 selective siRNAs that result in a 75% and 85% knockdown respectively without affecting the  
139 expression of the other isoform **(Figure 3A)**. In response to shear stress, Nck1 depleted cells  
140 showed significantly less NF- $\kappa$ B phosphorylation **(Figure 3B/C)** and nuclear translocation **(Figure**  
141 **3D/E)**, whereas Nck2 depletion did not affect NF- $\kappa$ B activation by flow. To confirm these effects,  
142 we utilized lentiviral shRNA constructs to selectively deplete Nck1 (100% knockdown) and Nck2  
143 (90% knockdown) **(Figure 3F)**. Similar to siRNA data, only HAECs expressing Nck1 shRNA  
144 showed significant amelioration of NF- $\kappa$ B phosphorylation **(Figure 3G/H)** and nuclear  
145 translocation **(Figure 3I/J)**, whereas cells expressing Nck2 shRNA did not significantly differ from



146 cells expressing scrambled shRNA. MAECs isolated from Nck1 KO mice showed similar results  
147 with remarkable reduction in NF- $\kappa$ B activation following shear stress (**Supplemental Figure II**),  
148 whereas MAECs from iEC-Nck2 KO mice showed normal shear stress-induced NF- $\kappa$ B activation.  
149 To assess the specific role of Nck1 in atheroprone disturbed flow models, HAECs transfected with  
150 Nck1 and Nck2 siRNA or shRNA were exposed to oscillatory shear stress for 18 hours, and  
151 proinflammatory signaling (NF- $\kappa$ B) and proinflammatory gene expression (VCAM-1/ICAM-1) were  
152 assessed. Oscillatory flow-induced NF- $\kappa$ B activation (p65 Ser536 phosphorylation) and VCAM-  
153 1/ICAM-1 expression were blunted by Nck1 siRNA (**Figure 4A-C**) and Nck1 shRNA (**Figure 4D-**  
154 **F**), whereas Nck2 depletion (siRNA and shRNA) had no significant effects on any of these  
155 responses.

156 While these data identify Nck1 as a critical regulator of NF- $\kappa$ B activation and proinflammatory  
157 gene expression by atheroprone hemodynamics, Nck1 did not affect all shear stress responses.  
158 Neither Nck1 nor Nck2 depletion affected KLF2 expression under oscillatory shear stress (**Figure**  
159 **4C/F**) or activation of other classic shear stress-induced signaling pathways, such as Akt, eNOS,  
160 and ERK1/2 phosphorylation (**Figure 5A**). Nck1/2 adaptor proteins classically regulate pathways  
161 involved in cytoskeletal remodeling, and steady laminar shear stress induces alignment of actin  
162 cytoskeleton in the direction of flow<sup>23</sup>. While siRNA-mediated knockdown of both Nck1 and Nck2  
163 inhibited the endothelial alignment response to laminar shear stress (LSS) (**Supplemental Figure**  
164 **III**), depletion of only Nck2, and not Nck1, was sufficient to prevent flow-induced cytoskeletal  
165 alignment (**Figure 5B/C**). Collectively these data demonstrate a critical role for Nck1 in endothelial  
166 activation by atheroprone flow, whereas Nck2 expression is required for the cytoskeletal  
167 alignment response to atheroprotective laminar flow.

168 *Nck1 mediates disturbed flow-induced endothelial activation in vivo.*

169 Having shown that Nck1 regulates endothelial activation by atheroprone flow *in vitro*, we sought  
170 to investigate the differential effects of Nck1 and Nck2 in an *in vivo* model of disturbed flow.  
171 Following tamoxifen induction, inducible endothelial-specific control mice (iEC-Control; VE-  
172 cadherinCreERT2<sup>tg/?</sup>, ApoE<sup>-/-</sup>), Nck1 knockout (VE-cadherinCreERT2<sup>tg/?</sup>, Nck1<sup>-/-</sup>, ApoE<sup>-/-</sup>),  
173 endothelial-specific Nck2 knockouts (iEC-Nck2 KO; VE-cadherinCreERT2<sup>tg/?</sup>, Nck2<sup>fl/fl</sup>, ApoE<sup>-/-</sup>),  
174 and endothelial-specific Nck1/2 double knockout mice (iEC-Nck1/2 DKO; VE-  
175 cadherinCreERT2<sup>tg/?</sup>, Nck1<sup>-/-</sup>, Nck2<sup>fl/fl</sup>, ApoE<sup>-/-</sup>) were subjected to partial carotid ligation (PCL) to  
176 induce disturbed flow-associated endothelial activation specifically in the left carotid artery<sup>17,24</sup>.  
177 Changes in endothelial mRNA expression was assessed after 48 hours, whereas changes in  
178 inflammatory gene expression and macrophage recruitment was assessed after 7 days (**Figure**  
179 **6A**). To assess endothelial activation, endothelial mRNA was isolated from the left and right  
180 carotid vessels by TRIzol flush after tissue harvesting<sup>25</sup>. The purity of intimal mRNA and  
181 medial/adventitial mRNA was confirmed by measuring platelet endothelial cell adhesion  
182 molecule-1 (PECAM-1) and  $\alpha$ -smooth muscle actin (SMA) expression (**Supplemental Figure**  
183 **IVa/b**). Endothelial-specific deletion of Nck2 was confirmed in iEC-Nck2 KO and iEC-DKO mice,  
184 as Nck2 mRNA expression was depleted in the intimal but not the medial/adventitial fractions  
185 (**Supplemental Figure IVc/d**). KLF2 showed decreased expression in the ligated left carotid  
186 compared to the right carotid control, confirming a disturbed flow-associated gene expression  
187 profile (**Figure 6B**). However, this downregulation did not differ among experimental animals.  
188 Nck1 knockouts showed a pronounced reduction in disturbed flow-induced VCAM-1 and ICAM-1  
189 mRNA expression (**Figure 6B**). However, Nck2 deletion (iEC-Nck2 KO) did not affect disturbed  
190 flow-induced VCAM-1 and ICAM-1 expression, and VCAM-1/ICAM-1 mRNA expression did not  
191 significantly decrease in iEC-Nck1/2 DKO mice compared to Nck1 KO mice (**Figure 6B**).

192 To examine early atherogenic remodeling in the ligated carotid arteries, tissue was collected 7  
193 days post-ligation and assessed for markers of inflammation by immunohistochemistry.  
194 Consistent with early changes in mRNA expression, VCAM-1 and ICAM-1 protein levels were  
195 significantly reduced in Nck1 KO mice after PCL compared to iEC-Control mice (**Figure 6 C-E**)  
196 whereas iEC-Nck2 KO animals were similar to controls. Similarly, Nck1 KO mice showed a  
197 significant reduction in intimal macrophage recruitment (Mac2-positive area) compared to iEC-  
198 Control mice (**Figure 6F/G**). Nck1 KO also significantly reduced adventitial macrophage content  
199 (**Figure 6F/H**), but endothelial Nck2 deletion (iEC-Control vs iEC-Nck2 KO; Nck1 KO vs iEC-  
200 Nck1/2 DKO) did not affect intimal or adventitial macrophage infiltration (**Figure 6F-H**). Taken  
201 together, our data suggest a direct role for Nck1 in regulating endothelial activation and  
202 macrophage recruitment under atheroprone hemodynamics.

203 *Nck1 deletion reduces atherosclerotic plaque formation.*

204 Atheroprone flow establishes local susceptibility to endothelial activation and to diet-induced  
205 atherosclerotic plaque development<sup>26</sup>. Having observed differential effects for Nck1 and Nck2 in  
206 response to atheroprone flow-induced endothelial activation, we sought to determine if  
207 atherosclerotic plaque development was altered in Nck1 KO mice. iEC-Control, Nck1 KO, iEC-  
208 Nck2 KO, or iEC-DKO mice were fed high fat diet (HFD) for 12 weeks to induce atherosclerosis.  
209 No significant differences were observed in body weight over the 12 weeks of HFD feeding,  
210 though Nck1 KO mice tended to be smaller (**Supplemental Figure Va**), and no changes were  
211 noted for heart weight (**Supplemental Figure Vb**) or for plasma cholesterol, triglycerides or HDL  
212 levels among the experimental groups (**Supplemental Figure Vc-e**). However, Nck1 KO mice  
213 showed significant reductions in the plasma levels of several proinflammatory mediators,  
214 including interleukin-1 $\alpha$  (IL-1 $\alpha$ ), IL-1 $\beta$ , TNF- $\alpha$ , and MCP-1 (**Supplemental Figure VI**), highlighting  
215 the proinflammatory role of Nck1. Atherosclerotic lesion formation was assessed in four different

216 vascular sites, including the aorta, the aortic sinus, the brachiocephalic artery, and the right and  
217 left carotid sinuses. En face analysis of atherosclerosis in the aorta was assessed by Oil red O  
218 staining and calculated as the percent lesion area compared to the total surface area of the aorta.  
219 While iEC-Nck2 KO mice did not differ from iEC-Controls, Nck1 KO mice show a significant  
220 reduction in plaque burden in the aorta (**Figure 7A/B**), brachiocephalic artery (**Supplemental**  
221 **Figure VIIa/b**), and the carotid sinus (**Figure 7C/D**). Atherosclerosis did not decrease further in  
222 the iEC-Nck1/2 DKO compared to the Nck1 KO, suggesting the endothelial Nck2 does not  
223 significantly contribute to atherogenic endothelial activation.

224 To assess atherosclerotic plaque characteristics in this model, plaques were stained for  
225 macrophage (Mac2 positive area) and smooth muscle ( $\alpha$ -smooth muscle actin (SMA) positive).  
226 Compared to iEC-Control mice, Nck1 KO mice show a significant reduction in macrophage area  
227 in both the carotid sinus (**Figure 7E/F**) and brachiocephalic arteries (**Supplemental Figure**  
228 **VIIc/d**). Similarly, Nck1 deletion reduces plaque smooth muscle (SMA positive) area  
229 (**Supplemental Figure VIIe/f**) and lipid core area (**Figure 7G**) at these sites, consistent with the  
230 very early stages of plaque formation observed in Nck1 KO and iEC-Nck1/2 DKO mice.  
231 Atherosclerotic lesions in the brachiocephalic artery and carotid sinuses tend to be less well  
232 developed than the plaques in the aortic root, potentially due to delayed onset of plaque formation  
233 at these sites<sup>27</sup>. Unlike other sites, we did not observe any differences in plaque size in the aortic  
234 root (**Figure 7H**). However, the plaques that formed showed reduced macrophage area (**Figure**  
235 **7I/J**) and enhanced smooth muscle area (**Figure 7I/K**), suggestive of enhanced plaque stability.

236 *Nck1 regulates inflammation via its SH2 and SH3.1 domains.*

237 To understand why Nck1 but not the highly homologous Nck2 regulates endothelial activation, we  
238 conducted domain swap experiments mixing the Nck1 SH2 domain with Nck2 SH3 domains and  
239 the Nck2 SH2 domain with Nck1 SH3 domains (**Figure 8A**). We confirmed similar expression

240 levels of transfected constructs encoding Nck1, Nck2, the Nck1 SH2/Nck2 SH3 chimera, and the  
241 Nck2 SH2/Nck1 SH3 chimera in Nck1/2 DKO cells by Western blotting (**Figure 8B**). Nck1, but not  
242 Nck2, re-expression restored oscillatory shear stress-induced NF- $\kappa$ B activation (**Figure 8C**),  
243 VCAM-1 expression (**Figure 8D**) and ICAM-1 expression (**Supplemental Figure VIIIa**) in the  
244 Nck1/2 DKO cells. However, only the Nck1 SH2/Nck2 SH3 chimera showed a similar restoration,  
245 suggesting that the Nck1 SH2 domain is essential to form the signaling complex required for  
246 oscillatory flow-induced endothelial activation. However, the redundancy of the Nck1 and Nck2  
247 SH3 domains does not exclude them as important for the activation of this response. To gain  
248 further insight into the Nck1 domains regulating oscillatory flow-induced NF- $\kappa$ B activation, we  
249 introduced single point mutations (**Figure 8E/F**) to inactivate the Nck1 SH2 domain (R308M, Nck1  
250 SH2\*), the first SH3 domain (W38K, Nck1 SH3.1\*), the second SH3 domain (W143K, Nck1  
251 SH3.2\*), or the third SH3 domain (W229K, Nck1 SH3.3\*). Following oscillatory shear stress  
252 exposure, NF- $\kappa$ B activation and VCAM-1 expression were only blunted in cells expressing the  
253 Nck1 SH2\* and the Nck1 SH3.1\* constructs (**Figure 8G-I**), suggesting critical roles for Nck1 SH2-  
254 based phosphotyrosine binding and Nck1 SH3.1-based binding partners. The Nck SH3.1 domain  
255 binds to an atypical proline rich region containing the sequence PxxDY, and the small molecule  
256 inhibitor AX-024 binds to the Nck1 SH3.1 DY pocket to prevent its interaction with the T cell  
257 receptor<sup>28</sup>. Treatment with AX-024 reduces NF- $\kappa$ B activation by acute shear stress (**Figure 8J/K**)  
258 and oscillatory shear stress (**Figure 8L**), suggesting that Nck1 SH3.1 inhibition may reduce  
259 endothelial activation at atheroprone sites (**Supplemental Figure VIIIb**).

## 260 **DISCUSSION.**

261 Atherogenic endothelial activation promotes vascular permeability and enhances adhesiveness  
262 for circulating leukocytes<sup>26</sup>. In atherosclerosis, shear stress critically regulates endothelial  
263 activation, with atheroprotective laminar flow reducing activation and atheroprone disturbed flow

264 promoting activation<sup>29</sup>. In this manuscript, we provide the first description of the Nck family of  
265 signaling adaptors (Nck1 and Nck2) as novel regulators of atherogenic endothelial activation *in*  
266 *vitro* and *in vivo*. Our data identify Nck1 as a critical signaling mediator of shear stress-induced  
267 NF- $\kappa$ B activation and proinflammatory gene expression, and show important roles for the  
268 phosphotyrosine-binding Nck1 SH2 domain and the proline-rich region-binding first SH3 domain.  
269 In contrast, Nck2 expression is dispensable for flow-induced endothelial activation but critically  
270 required for laminar flow-induced endothelial alignment. *In vivo*, only Nck1 deletion reduces  
271 endothelial proinflammatory gene expression, monocyte recruitment, and early plaque formation  
272 in both the partial carotid ligation model of disturbed flow and in diet-induced spontaneous  
273 atherosclerosis. Taken together, these data identify a novel isoform-specific role for Nck1 in  
274 mediating endothelial activation under atheroprone hemodynamics.

275 The Nck adaptor proteins have been extensively studied in diverse signaling events, most often  
276 affecting pathways leading to cellular morphogenesis<sup>8</sup>. However, the role of Nck1/2 signaling in  
277 the context of atherogenic endothelial activation remains limited. We previously demonstrated  
278 that inhibiting Nck1/2 signaling by siRNA blunts oxidative stress induced NF- $\kappa$ B activation in  
279 models of ischemia/reperfusion injury<sup>13</sup>, but isoform-specific roles were not addressed. A peptide  
280 derived from the Nck1/2-binding sequence in p21 activated kinase reduces NF- $\kappa$ B activation<sup>13</sup>  
281 and permeability in both cell culture models and in atherosclerosis<sup>30</sup>, but this peptide could be  
282 targeting other SH3 domain containing proteins or affecting non-endothelial cell types to mediate  
283 this effect. Our current data provide the first direct evidence that Nck1/2 mediates inflammation  
284 due to atheroprone flow and demonstrates an unexpected isoform selective role in mediating flow-  
285 induced NF- $\kappa$ B activation and cytoskeletal alignment. Deletion of Nck1 reduces early endothelial  
286 proinflammatory gene expression in disturbed flow models, reduces plasma levels of circulating  
287 proinflammatory cytokines, limits monocyte recruitment at sites of induced and endogenous

288 disturbed flow, and significantly blunts atherosclerotic plaque formation. Intriguingly, the Nck1  
289 gene resides in regions of chromosome 3q22.3 linked to the susceptibility of stroke<sup>31</sup> and  
290 premature myocardial infarction (MI)<sup>32</sup>.

291 Nck1 and Nck2 are functionally redundant during organismal development, vasculogenesis, and  
292 post-natal angiogenesis<sup>7,10</sup>, but some non-redundant functions have also been described<sup>33</sup>. For  
293 example, T cell receptor-induced ERK and NFAT activation critically require Nck1, but not Nck2,  
294 due to interactions between the Nck1 SH3.1 domain and the T cell receptor<sup>12</sup>. In contrast, Nck2  
295 but not Nck1 facilitates EGF receptor-induced actin polymerization<sup>34</sup>. We now provide the first  
296 evidence for non-redundant functions of Nck1 and Nck2 in the vasculature, with Nck1 mediating  
297 flow-induced endothelial activation and Nck2 mediating flow-induced endothelial alignment. While  
298 the modular structure of Nck1/2 allow for numerous individual and probably simultaneous protein-  
299 protein interactions<sup>9</sup>, our data specifically identify the Nck1 SH2 domain and the Nck1 SH3.1 (first  
300 SH3 domain) as critical mediators of endothelial activation by atheroprone flow. Previous studies  
301 have identified at least 60 Nck1 and Nck2 associated proteins mostly involved in cytoskeletal  
302 organization<sup>20,35</sup>. Although the consensus SH2 binding sequence for Nck1 and Nck2 are highly  
303 similar<sup>36</sup>, the Nck1 and Nck2 SH2 domains are able to bind distinct phosphotyrosine sequences  
304 on growth factor receptors<sup>36</sup> and at sites of cell adhesion<sup>36</sup>. Consistent with this selectivity,  
305 phosphorylated Nephrin selectively recruits Nck1 and not Nck2 through Nck1's SH2 domain *in*  
306 *vivo*<sup>37</sup>. To our knowledge the binding and signaling properties of individual Nck1 SH3 domains  
307 have yet to be systematically explored. The critical SH3.1 domain in Nck1 binds an atypical PxxDY  
308 motif that undergoes negative regulation by tyrosine phosphorylation, providing a potential  
309 negative feedback response that would be expected to limit atherogenic endothelial activation.  
310 However, future studies will be required to identify the Nck1 SH3.1 binding partners important for  
311 endothelial activation by atheroprone flow.

312 Due to its role in mediating inflammation and angiogenesis, therapeutic targeting of the Nck1/2  
313 adaptor proteins has been an area of intense investigations. A blocking peptide to the Nck1/2  
314 SH3.2 (second SH3) domain reduces angiogenesis *in vivo*<sup>38</sup>, blunts vascular permeability in  
315 models of I/R injury<sup>13</sup> and atherosclerosis<sup>30</sup>, and limits inflammation in atherosclerosis and LPS-  
316 induced lung injury<sup>39,40</sup>. However, targeting both Nck1 and Nck2 with this inhibitor is unlikely to be  
317 beneficial to atherosclerotic disease, as the inhibitor would limit angiogenesis in ischemic regions  
318 affected by the plaque. Since inhibition of either isoform alone is not sufficient to reduce  
319 angiogenesis<sup>10</sup>, targeting Nck1 may represent a realistic therapeutic to limit endothelial activation  
320 without affecting angiogenic tissue remodeling. A recently developed small molecule Nck1 SH3.1  
321 inhibitor (A-X024) has shown prophylactic effects in the nanomolar range in experimental models  
322 of T cell-mediated autoimmune and inflammatory diseases, including psoriasis, asthma, and  
323 multiple sclerosis<sup>28</sup>. We demonstrate that A-X024 significantly reduces endothelial activation in  
324 models of disturbed flow, suggesting that this inhibitor may be beneficial to limit plaque formation  
325 without preventing ischemic angiogenesis.

326 In conclusion, our results reveal Nck1, but not Nck2, as a key regulator for endothelial activation  
327 and atherosclerotic plaque development. Furthermore, we identified the Nck1 SH2 domain and  
328 the first Nck1 SH3 domain as critical mediators of atheroprone flow-induced NF- $\kappa$ B activation and  
329 proinflammatory gene expression. Taken together, our findings extend our current understanding  
330 of endothelial cell activation in response to atheroprone hemodynamics and identify inhibition of  
331 Nck1 by AX-024 as a potential future therapeutic in atherosclerotic cardiovascular disease.



332 **Acknowledgements:**

333 The authors acknowledge the COBRE Center for Redox Biology and Cardiovascular Disease and  
334 the Redox Molecular Signaling Core for site-directed mutagenesis of Nck1 constructs.

335 **Sources of Funding:**

336 This work was supported NIH grants [HL098435, HL133497, HL141155] to AWO and by a  
337 Malcolm Feist Cardiovascular Research Endowment Post-doctoral Fellowship (to M A). Research  
338 reported in this publication was supported by an Institutional Development Award (IDeA) from the  
339 National Institute of General Medical Sciences of the National Institute of Health under grant  
340 number P20GM121307.

341 **Disclosures:**

342 None.

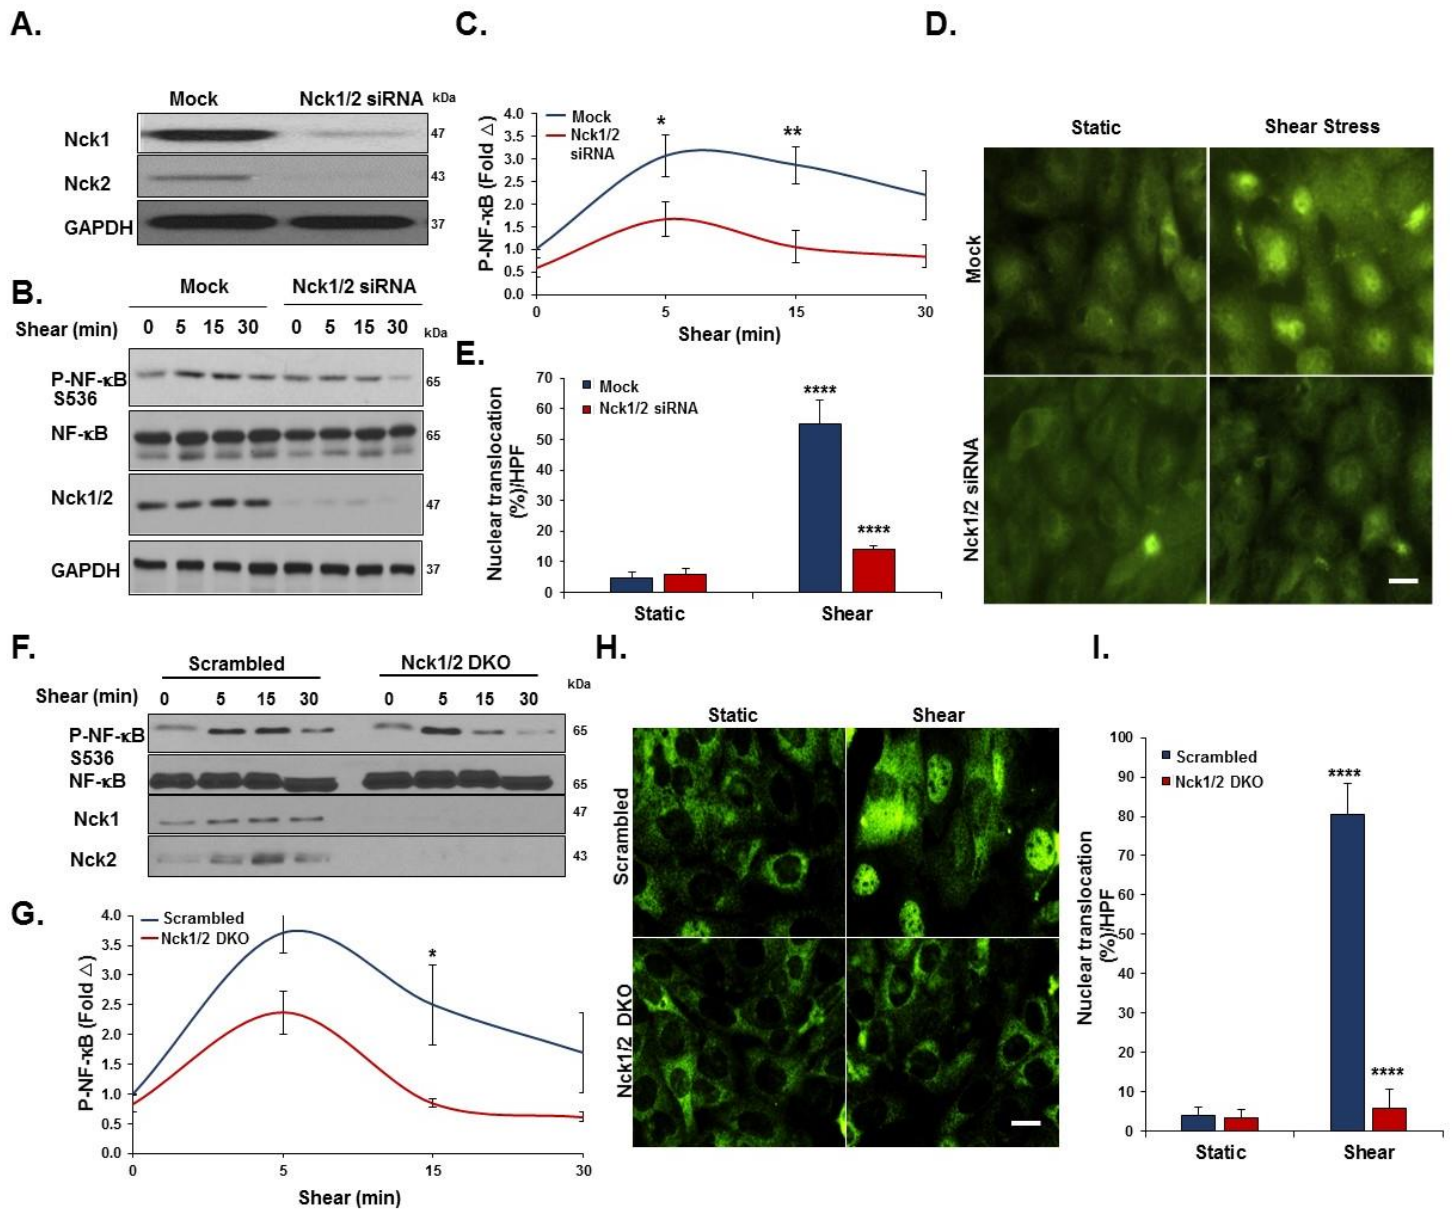

**Figure 1. Nck1/2 deletion ameliorate acute shear stress induced NF-κB activation.** **A)** Human aortic endothelial cells (HAECs) were transfected with siRNA specific for Nck1/2, and transfection efficiency was assessed using Western blot. **B-C)** HAECs were subjected to acute shear stress for the indicated times, and NF-κB activation was assessed by detection of p65 serine 536 phosphorylation by Western blot. **D-E)** p65 nuclear translocation was measured after 45 minutes of shear stress in Nck1/2 siRNA and mock control cells **F-I)** Nck1/2 was deleted from HAECs using CRISPR/Cas9 editing, and shear stress-induced NF-κB activation was assessed by **(F-G)** Western blotting for p65 phosphorylation and **(H-I)** staining for p65 nuclear translocation. Densitometric analysis was performed using Image j. Images were analyzed using NIS Elements software. Data are mean±SEM, n=4, analyzed by 2-Way ANOVA followed by Bonferroni's post-test, \*p<0.05, \*\*p<0.01, \*\*\*\*p<0.0001.

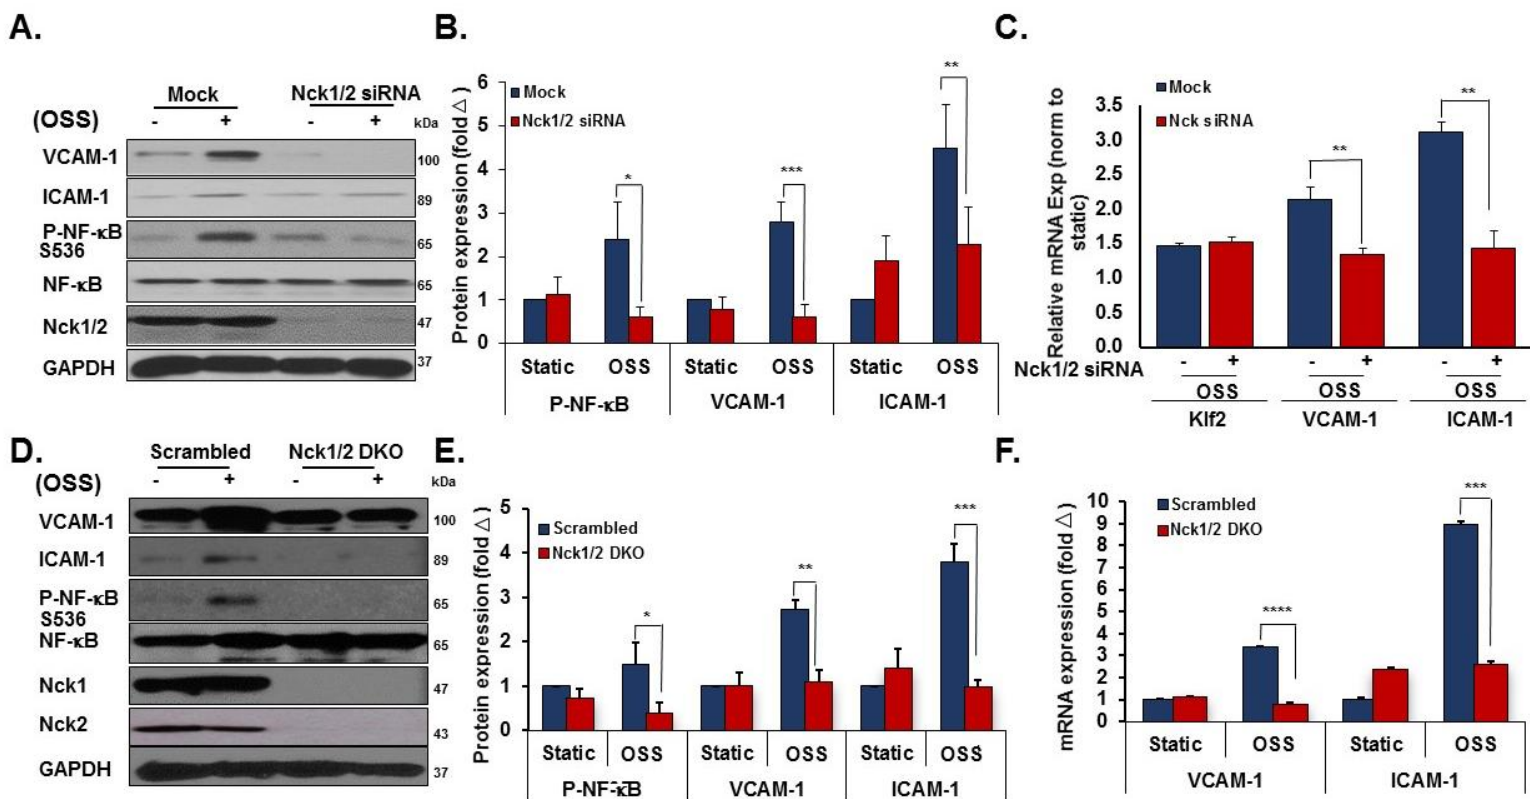

**Figure 2. Nck1/2 deletion ameliorates chronic oscillatory shear stress induced endothelial activation.**

**A/B)** HAECs were transfected with Nck1/2 siRNA, and oscillatory shear stress (OSS)-induced proinflammatory gene expression (VCAM-1, ICAM-1) and proinflammatory signaling (P-NF-κB Ser536) was assessed by Western blotting. **C)** HAECs were treated as in **(A)**, and mRNA expression was assessed by qRT-PCR. **D/E)** Nck1/2 was deleted from HAECs using CRISPR/Cas9 and OSS-induced proinflammatory gene expression and signaling was assessed by Western blotting. **F)** HAECs were treated as in **(D)**, and mRNA expression was assessed by qRT-PCR. Data are mean ± SEM, n=4, analyzed by 2-Way ANOVA followed by Bonferroni's post-test, \*p<0.05, \*\*p<0.01, \*\*\*p<0.001, \*\*\*\*p<0.0001.

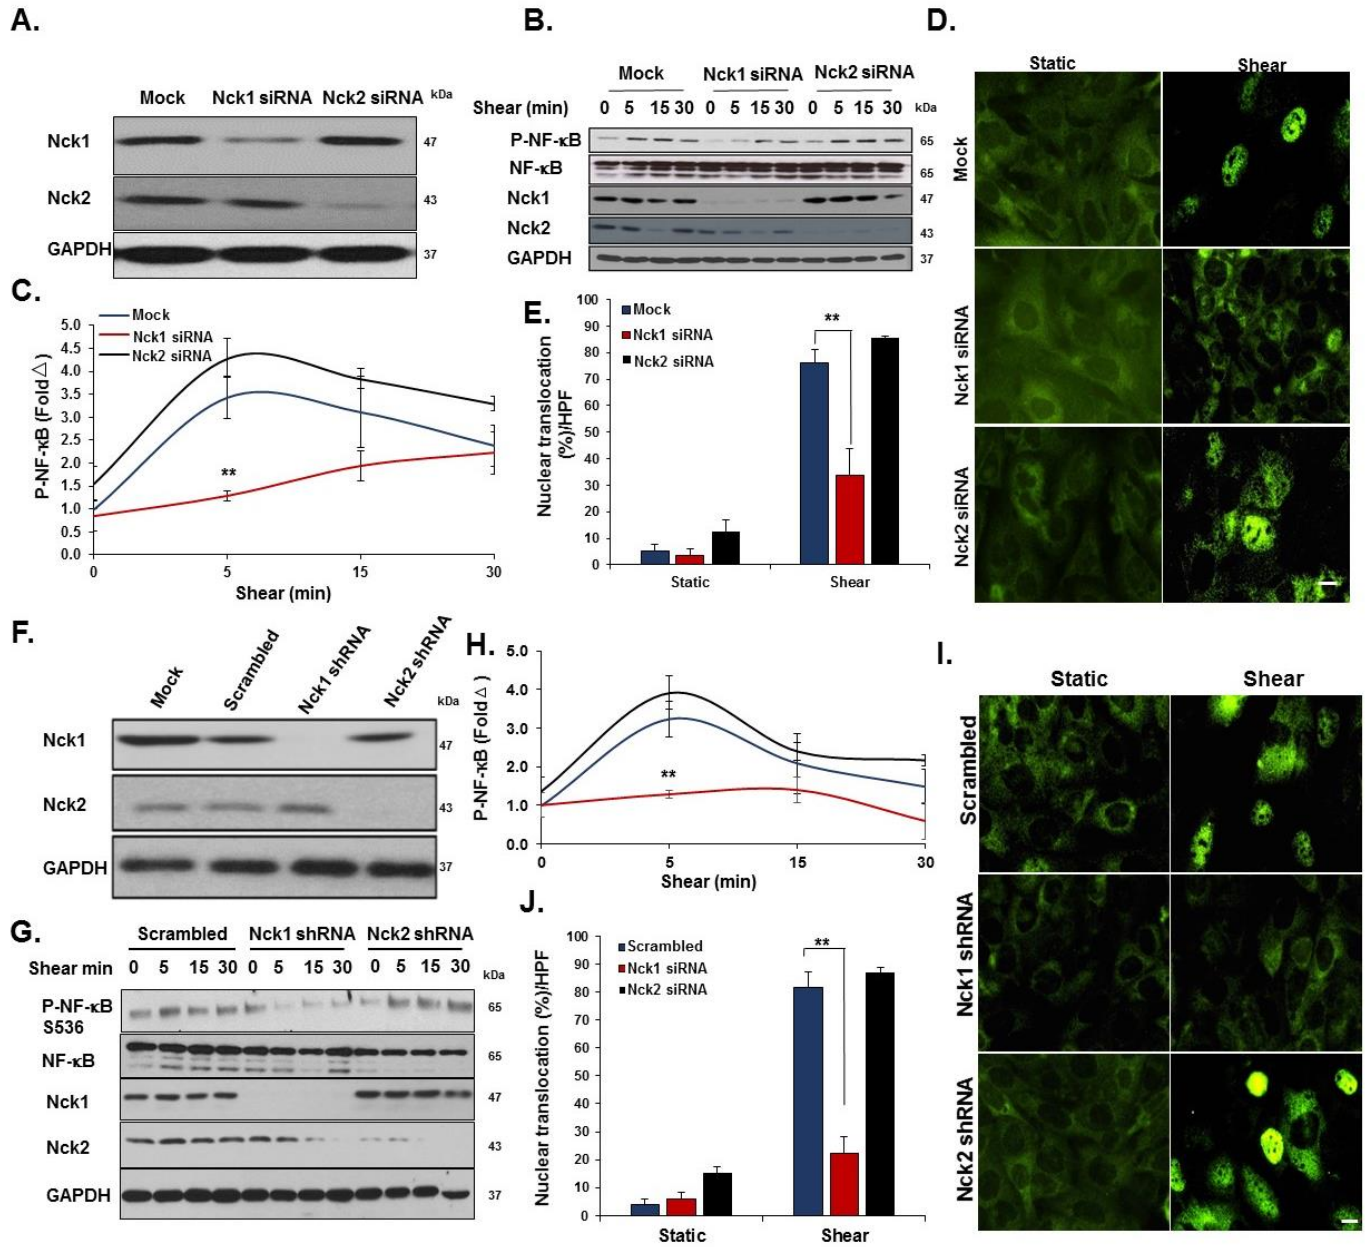

**Figure 3. Nck1, but not Nck2, deletion ameliorates acute shear stress induced activation.** **A)** Transfection efficiency of selective Nck1 and Nck2 knockdown in HAECs using siRNA. **B-E)** HAECs lacking either Nck1 or Nck2 were subjected to acute shear stress for the indicated times, and NF-κB activation was assessed by measuring **(B/C)** NF-κB phosphorylation and **(D/E)** nuclear translocation. **F)** Lentiviral Nck1 and Nck2 knockdown by shRNA. **G-H)** HAECs expressing either Nck1 shRNA or Nck2 shRNA were subjected to acute shear stress for the indicated times, and NF-κB activation was assessed by measuring **(G/H)** NF-κB phosphorylation and **(I/J)** nuclear translocation. Data are mean ± SEM, n=4, analyzed by 2-Way ANOVA followed by Bonferroni's post-test, \*\*p<0.01.

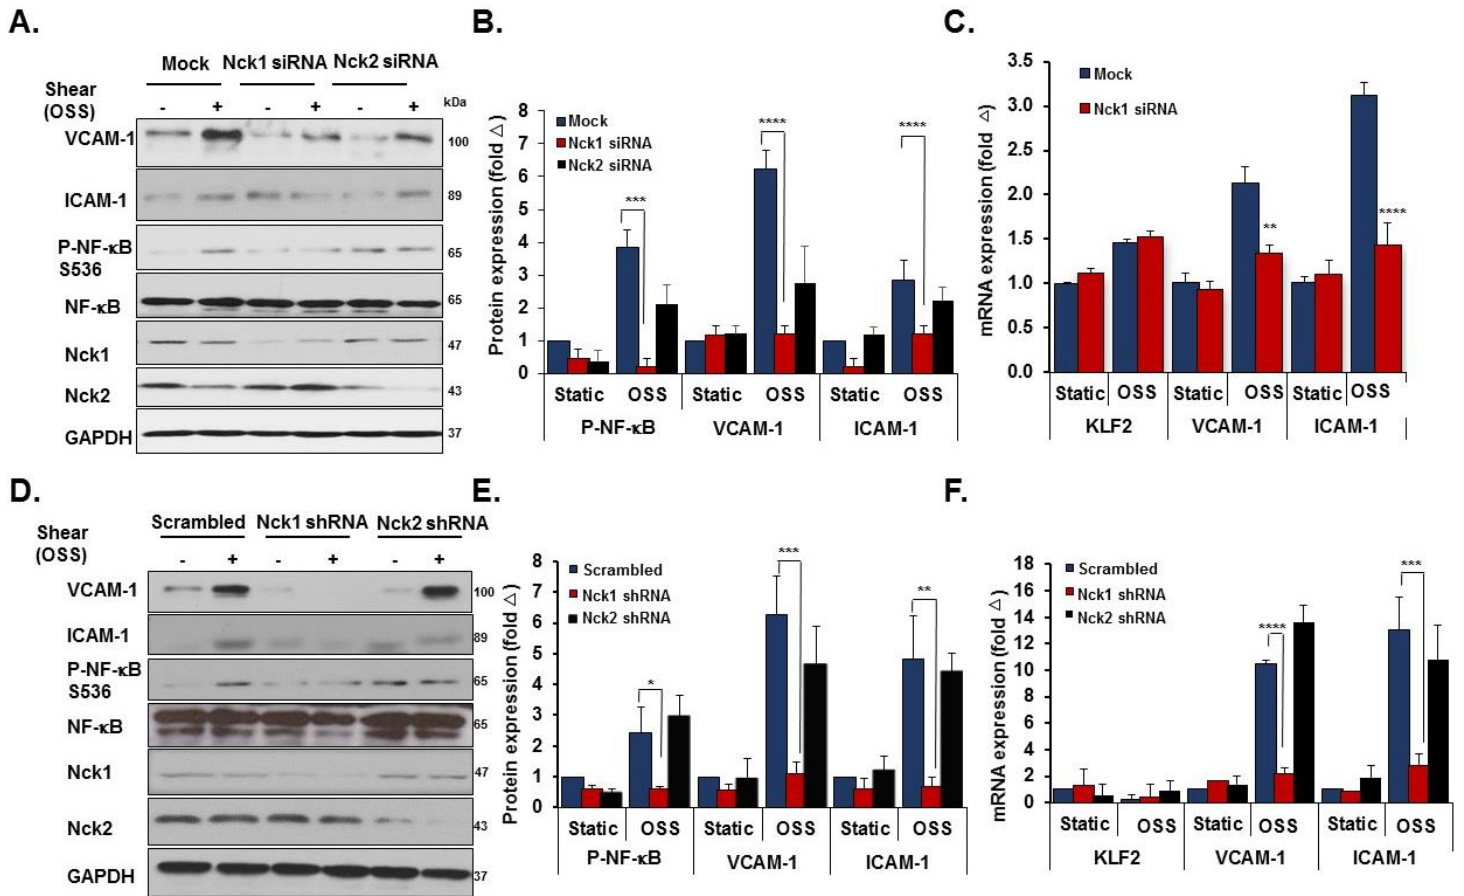

**Figure 4. Nck1, but not Nck2, deletion ameliorates chronic oscillatory shear stress induced activation. A/B)** HAECs were transfected with either Nck1 or Nck2 siRNA, and oscillatory shear stress (OSS, 18h) induced proinflammatory gene expression (ICAM-1/VCAM-1) and signaling (P-NF-κB Ser536) were assessed by Western blotting. **C)** HAECs were treated as in **(A)**, and mRNA expression was assessed by qRT-PCR. **D/E)** HAECs were transfected with either Nck1 or Nck2 shRNA, and oscillatory shear stress (OSS, 18h) induced proinflammatory gene expression (ICAM-1/VCAM-1) and signaling (P-NF-κB Ser536) were assessed by Western blotting. **F)** HAECs were treated as in **(D)**, and mRNA expression was assessed by qRT-PCR. Data are from n=4, mean ± SEM, analyzed by 2-Way ANOVA followed by Bonferroni's post-test, \*p<0.05, \*\*p<0.01, \*\*\*p<0.001, \*\*\*\*p<0.0001.

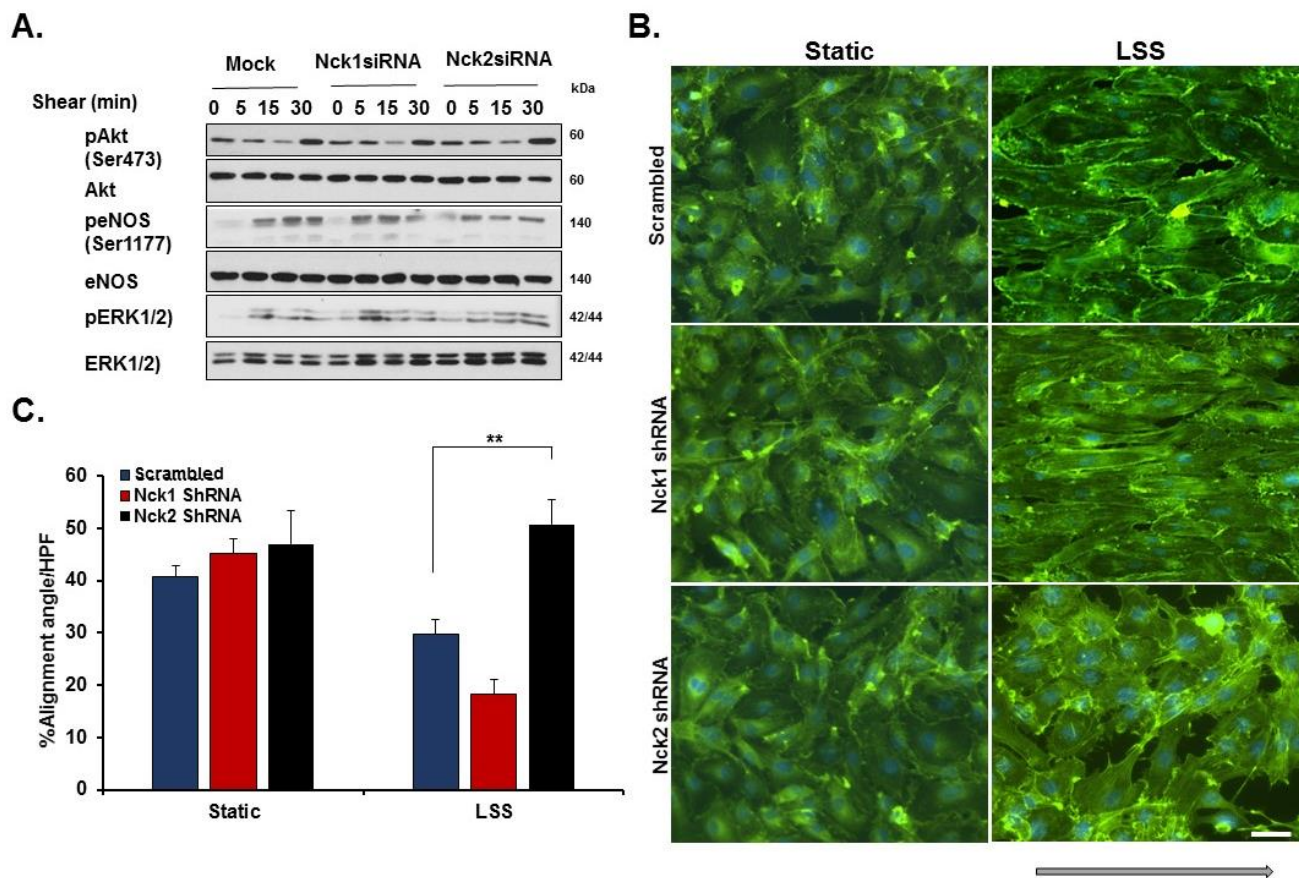

**Figure 5. Nck2, but not Nck1, regulates laminar flow induced cytoskeletal alignment.** **A)** Endothelial cells subjected to acute shear stress for the indicated times, and activation of Akt, eNOS, and ERK1/2 assessed by Western blotting. Representative blots are shown. n=4. **B)** HAECs transduced with Nck1, Nck2 or scrambled shRNA were subjected to laminar shear stress (LSS; 10 dynes/cm<sup>2</sup> for 18h) and alignment of the actin cytoskeleton assessed by phalloidin-Alexa488 staining. Nuclei were counterstained with DAPI. Arrow indicates the direction of flow. Scale bar=100µm. **C)** % Cytoskeletal alignment angle was measured using NIS Elements software and compared among experimental groups. Data are from n=4, mean ± SEM, analyzed by 2-Way ANOVA followed by Bonferroni's post-test, \*\*p<0.01.

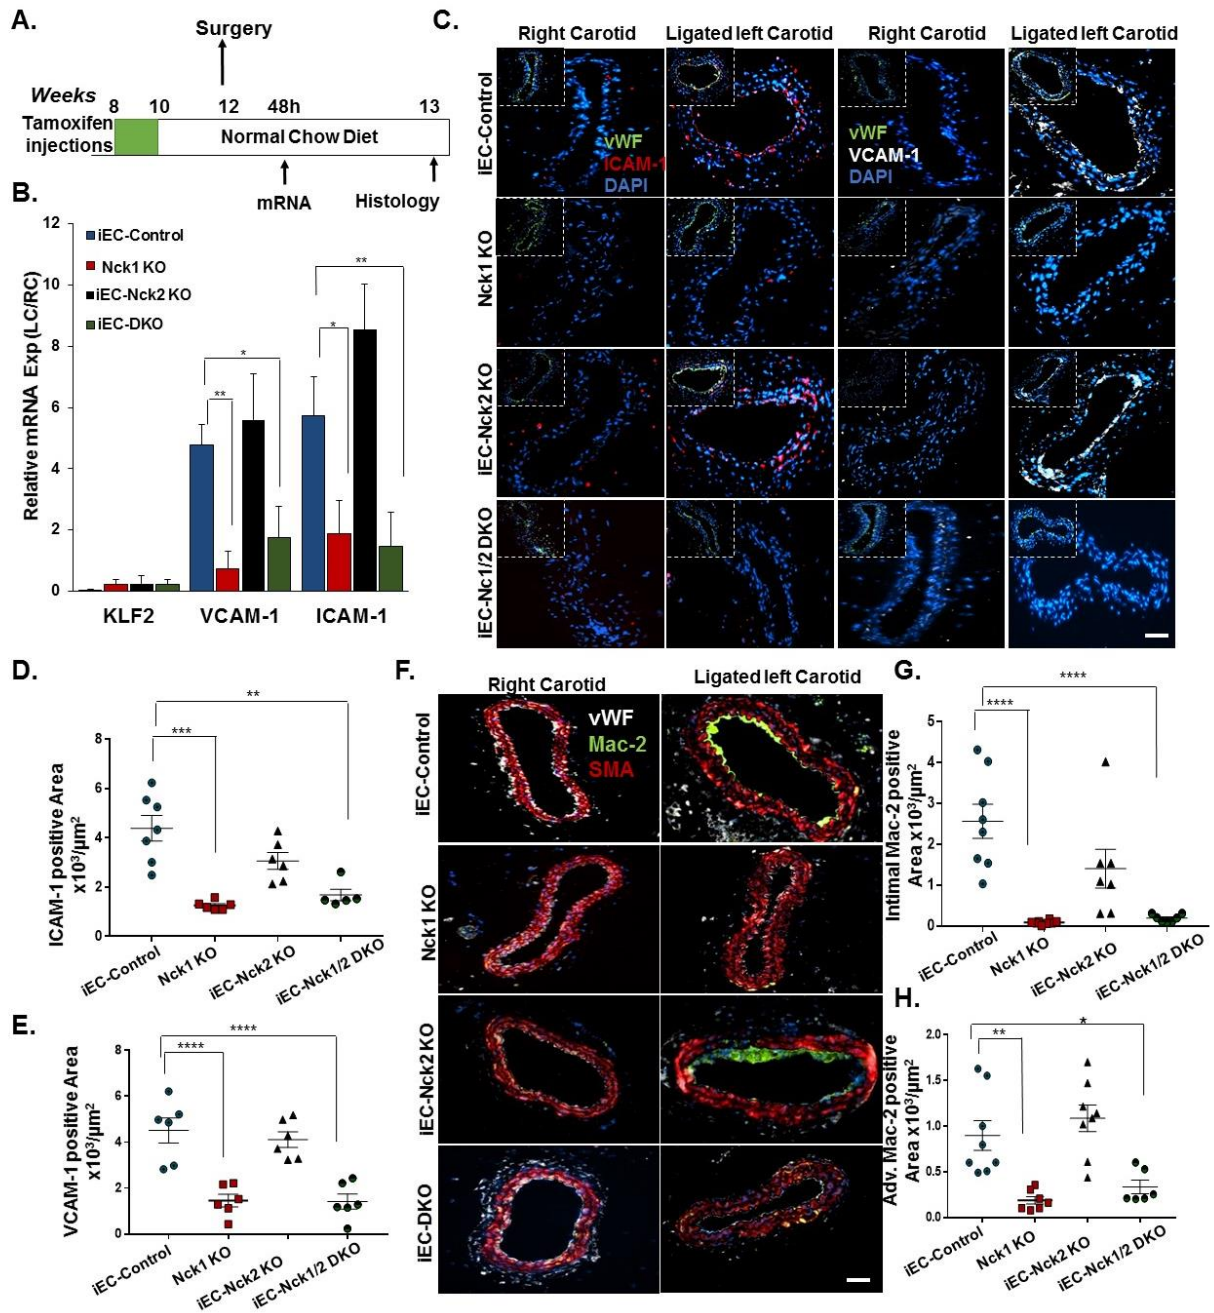

**Figure 6. Ablation of Nck1 but not Nck2 blunts Partial Carotid Ligation Induced Inflammation.** **A)** Schematic of the study in which four groups of mice were subjected to the ligation surgery as indicated animal genotypes and time of surgery. Endothelial mRNA analysis from iEC-Control, Nck1 KO, iEC-Nck2 KO, and iEC-Nck1/2 DKO mice. mRNA from the left carotid was normalized to the unligated right carotid and to the housekeeping gene  $\beta$ -microglobulin. Data analyzed by 2-Way ANOVA and Bonferroni's post-test, \* $p < 0.05$ , \*\* $p < 0.01$ . **C-E)** ICAM-1 (red) and VCAM-1 (white) in the ligated left carotid compared to the unligated right carotid arteries among experimental groups. Endothelial cells stained with Von Willebrand factor (vWF) and the nuclei counterstained with DAPI. **F-H)** Macrophage staining (Mac-2, green) in the ligated and the unligated carotid arteries among experimental groups. Scale bars=100 $\mu\text{m}$ . Images analyzed using Nis Elements software, from  $n=7-10$  mice/group. Data are mean  $\pm$  SEM, analyzed by 1-Way ANOVA and Tukey's post-test, \* $p < 0.05$ , \*\* $p < 0.01$ , \*\*\* $p < 0.001$ , \*\*\*\* $p < 0.0001$ .

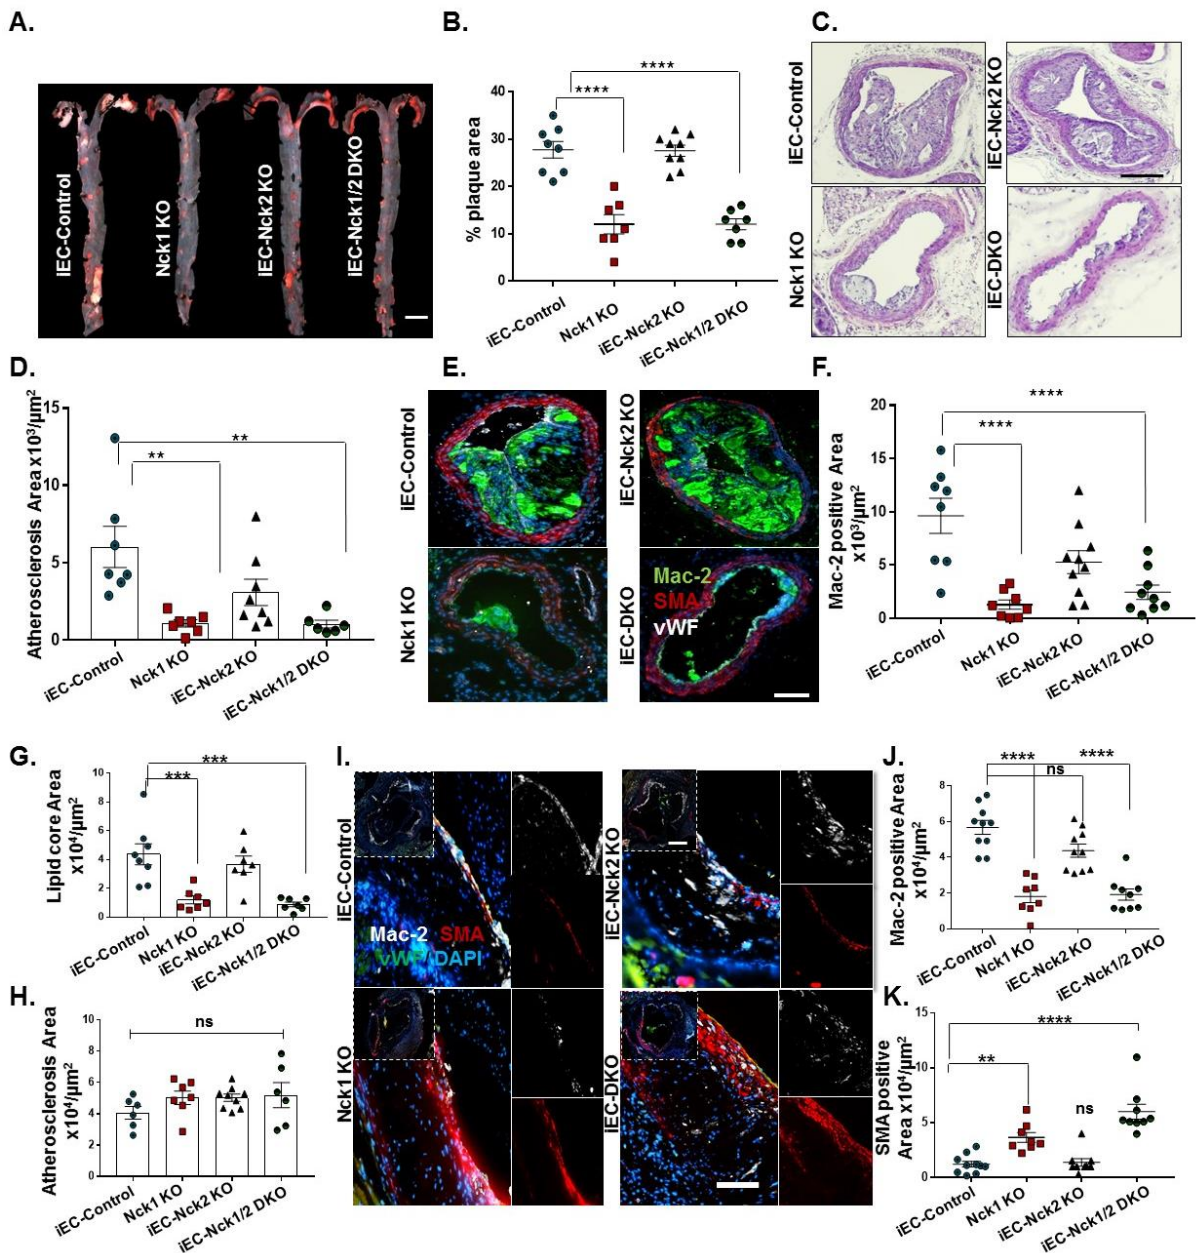

**Figure 7. Ablation of Nck1 but not Nck2 blunts high fat diet-induced atherosclerosis.** iEC-Control, Nck1 KO, iEC-Nck2 KO, and iEC-Nck1/2 DKO mice were fed high fat diet (HFD) for 12 weeks. **A)** Representative *en face* morphometric images of total aortic lesion area and **(B)** calculated whole aortic atherosclerosis (% of the total surface area). **C)** Representative stained H&E images of carotid atherosclerosis and **(D)** quantification of carotid atherosclerotic area among experimental groups. **E-F)** Analysis of plaque cellular content following staining for macrophages (Mac-2, green), smooth muscle cells (α-smooth muscle actin (SMA), red), and endothelium (vWF, white). **G)** Lipid core area quantification in carotid atherosclerosis. **H)** Aortic root atherosclerosis and **(I-K)** analysis of plaque cellular content following staining for macrophages (Mac-2, green), smooth muscle cells (α-smooth muscle actin (SMA), red), and endothelium (vWF, white) in plaques of the aortic roots. Analysis was performed using NIS-Elements software and data are represented as mean ± SEM, n=6-10/group, analyzed by 1-Way ANOVA, and Tukey's post-test, \*\*p<0.01, \*\*\*p<0.001, \*\*\*\*p<0.0001, ns=not significant. Scale bars=1mm or 50-200µm. ns=not significant.



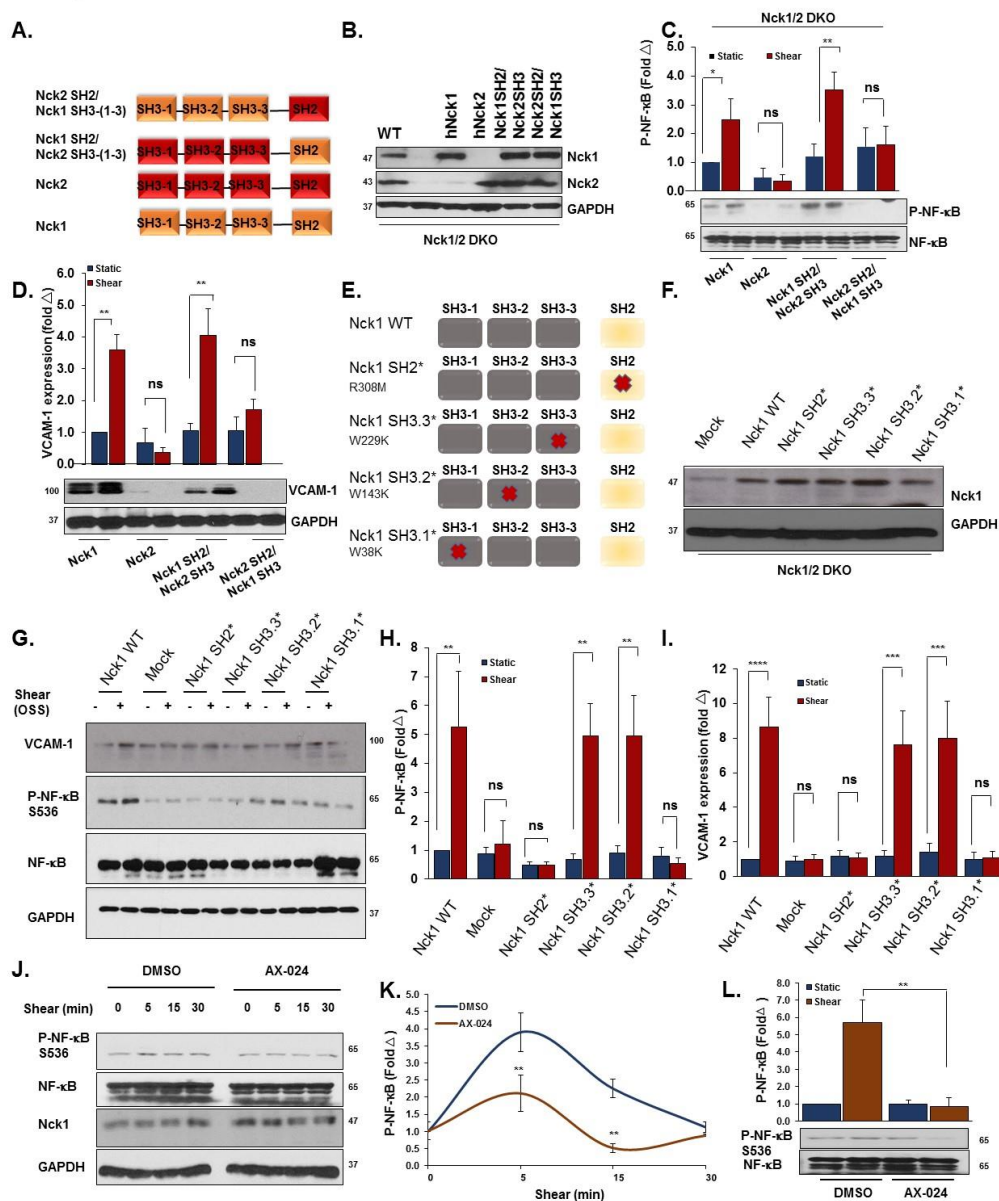

**Figure 8. Nck1 Regulates Shear Stress Induced Inflammation via its SH2 domain and the first domain of the SH3.** **A)** Schematic showing the domain structure of Nck1 and Nck2 and the two chimeras of Nck1 SH2/ Nck2 SH3 (1-3) and Nck2 SH2/ Nck1 SH3 (1-3). **B)** Western blot analysis showing comparable transduction efficiency of Nck1/2 chimeras following introducing the constructs in Nck1/2 DKO cells. n=3. **C-D)** Nck1/2 DKO HAECs were transduced with constructs in (A), and oscillatory shear stress-induced proinflammatory signaling (P-NF- $\kappa$ B Ser536) and gene expression (VCAM-1) were assessed. **E)** Schematic of Nck1 domain point mutations, and (F) Western blot analysis showing the efficiency of re-expression of different Nck1 mutants in Nck1/2 DKO HAECs. **G-I)** Nck1/2 DKO HAECs were transiently transfected with Nck1 or Nck1 variants described in (E), and OSS-induced proinflammatory signaling and gene expression assessed as indicated above. **J-K)** HAECs were pre-treated with AX-024 (10 nM) or DMSO control 1h before the cells were subjected to acute shear stress for the indicated times. Western blot analysis of NF- $\kappa$ B activation as assessed by Ser536 phosphorylation by Western blotting, n=3. **L)** NF- $\kappa$ B activation was assessed in HAECs pre-treated with DMSO or AX-024 (10 nM) 1h before oscillatory shear stress for 18h. Data are n=4, represented as mean  $\pm$  SEM, analyzed by 2-Way ANOVA, and Bonferroni's post-test, \*p<0.05, \*\*p<0.01, \*\*\*p<0.001, \*\*\*\*p<0.0001.

## References:

- 343 1. Davies PF. FLOW-MEDIATED ENDOTHELIAL MECHANOTRANSDUCTION.  
344 *Physiological Reviews*. 1995;75(3):519-560.
- 345 2. Ross R. Mechanisms of disease - Atherosclerosis - An inflammatory disease. *New*  
346 *England Journal of Medicine*. 1999;340(2):115-126.
- 347 3. Brooks AR, Lelkes PI, Rubanyi GM. Gene expression profiling of human aortic  
348 endothelial cells exposed to disturbed flow and steady laminar flow. *Physiological*  
349 *Genomics*. 2002;9(1):27-41.
- 350 4. Tabas I, Garcia-Cardena G, Owens GK. Recent insights into the cellular biology of  
351 atherosclerosis. *Journal of Cell Biology*. 2015;209(1):13-22.
- 352 5. Libby P, Ridker PM. Inflammation and atherothrombosis - From population biology and  
353 bench research to clinical practice. *Journal of the American College of Cardiology*.  
354 2006;48(9):A33-A46.
- 355 6. Ridker PM, Libby P, MacFadyen JG, et al. Modulation of the interleukin-6 signalling  
356 pathway and incidence rates of atherosclerotic events and all-cause mortality: analyses  
357 from the Canakinumab Anti-Inflammatory Thrombosis Outcomes Study (CANTOS).  
358 *European Heart Journal*. 2018;39(38):3499-3507.
- 359 7. Bladt F, Aippersbach E, Gelkop S, et al. The murine Nck SH2/SH3 adaptors are  
360 important for the development of mesoderm-derived embryonic structures and for  
361 regulating the cellular actin network. *Molecular and Cellular Biology*. 2003;23(13):4586-  
362 4597.
- 363 8. McCarty JH. The Nck SH2/SH3 adaptor protein: a regulator of multiple intracellular  
364 signal transduction events. *Bioessays*. 1998;20(11):913-921.
- 365 9. Pawson T. PROTEIN MODULES AND SIGNALING NETWORKS. *Nature*.  
366 1995;373(6515):573-580.
- 367 10. Dubrac A, Kunzel SE, Kunzel SH, et al. NCK-dependent pericyte migration promotes  
368 pathological neovascularization in ischemic retinopathy. *Nature Communications*.  
369 2018;9.
- 370 11. Chen M, She HY, Kim A, Woodley DT, Li W. Nck beta adapter regulates actin  
371 polymerization in NIH 3T3 fibroblasts in response to platelet-derived growth factor bb.  
372 *Molecular and Cellular Biology*. 2000;20(21):7867-7880.
- 373 12. Ngoenkam J, Paensuwan P, Preechanukul K, et al. Non-overlapping functions of Nck1  
374 and Nck2 adaptor proteins in T cell activation. *Cell Communication and Signaling*.  
375 2014;12.
- 376 13. Chen J, Leskov IL, Yurdagul A, et al. Recruitment of the adaptor protein Nck to PECAM-  
377 1 couples oxidative stress to canonical NF-kappa B signaling and inflammation. *Science*  
378 *Signaling*. 2015;8(365).
- 379 14. Reutershan J, Stockton R, Zarbock A, et al. Blocking p21-activated kinase reduces  
380 lipopolysaccharide-induced acute lung injury preventing polymorphonuclear leukocyte  
381 infiltration. *American Journal of Respiratory and Critical Care Medicine*.  
382 2007;175(10):1027-1035.
- 383 15. Yurdagul A, Green J, Albert P, McInnis MC, Mazar AP, Orr AW. alpha 5 beta 1 Integrin  
384 Signaling Mediates Oxidized Low-Density Lipoprotein-Induced Inflammation and Early  
385 Atherosclerosis. *Arteriosclerosis Thrombosis and Vascular Biology*. 2014;34(7):1362-+.
- 386 16. Funk SD, Yurdagul A, Green JM, Jhaveri KA, Schwartz MA, Orr AW. Matrix-Specific  
387 Protein Kinase A Signaling Regulates p21-Activated Kinase Activation by Flow in  
388 Endothelial Cells. *Circulation Research*. 2010;106(8):1394-U1204.

- 389 17. Yuan S, Yurdagul A, Peretik JM, et al. Cystathionine -Lyase Modulates Flow-Dependent  
390 Vascular Remodeling. *Arteriosclerosis Thrombosis and Vascular Biology*.  
391 2018;38(9):2126-2136.
- 392 18. Walpola PL, Gotlieb AI, Cybulsky MI, Langille BL. EXPRESSION OF ICAM-1 AND  
393 VCAM-1 AND MONOCYTE ADHERENCE IN ARTERIES EXPOSED TO ALTERED  
394 SHEAR-STRESS. *Arteriosclerosis Thrombosis and Vascular Biology*. 1995;15(1):2-10.
- 395 19. Clouthier DL, Harris CN, Harris RA, Martin CE, Puri MC, Jones N. Requisite Role for  
396 Nck Adaptors in Cardiovascular Development, Endothelial-to-Mesenchymal Transition,  
397 and Directed Cell Migration. *Molecular and Cellular Biology*. 2015;35(9):1573-1587.
- 398 20. Lettau M, Pieper J, Janssen O. Nck adapter proteins: functional versatility in T cells. *Cell*  
399 *Communication and Signaling*. 2009;7.
- 400 21. Buval L, Rashmi P, Lopez-Rivera E, et al. Proteasomal degradation of Nck1 but not  
401 Nck2 regulates RhoA activation and actin dynamics. *Nature Communications*. 2013;4.
- 402 22. Jacquet K, Banerjee SL, Chartier FJM, Elowe S, Bisson N. Proteomic Analysis of  
403 NCK1/2 Adaptors Uncovers Paralog-specific Interactions That Reveal a New Role for  
404 NCK2 in Cell Abcission During Cytokinesis. *Molecular & Cellular Proteomics*.  
405 2018;17(10):1979-1990.
- 406 23. Cunningham KS, Gotlieb AI. The role of shear stress in the pathogenesis of  
407 atherosclerosis. *Laboratory Investigation*. 2005;85(1):9-23.
- 408 24. Nam D, Ni CW, Rezvan A, et al. Partial carotid ligation is a model of acutely induced  
409 disturbed flow, leading to rapid endothelial dysfunction and atherosclerosis. *American*  
410 *Journal of Physiology-Heart and Circulatory Physiology*. 2009;297(4):H1535-H1543.
- 411 25. Radu M, Chernoff J. An in vivo Assay to Test Blood Vessel Permeability. *Jove-Journal of*  
412 *Visualized Experiments*. 2013(73).
- 413 26. Gimbrone MA, Topper JN, Nagel T, Anderson KR, Garcia-Cardena G. Endothelial  
414 dysfunction, hemodynamic forces, and atherogenesis. *Atherosclerosis V: the Fifth*  
415 *Saratoga Conference*. 2000;902:230-240.
- 416 27. Nakashima Y, Plump AS, Raines EW, Breslow JL, Ross R. APOE-DEFICIENT MICE  
417 DEVELOP LESIONS OF ALL PHASES OF ATHEROSCLEROSIS THROUGHOUT THE  
418 ARTERIAL TREE. *Arteriosclerosis and Thrombosis*. 1994;14(1):133-140.
- 419 28. Borroto A, Reyes-Garau D, Jimenez MA, et al. First-in-class inhibitor of the T cell  
420 receptor for the treatment of autoimmune diseases. *Science Translational Medicine*.  
421 2016;8(370).
- 422 29. Dai GH, Kaazempur-Mofrad MR, Natarajan S, et al. Distinct endothelial phenotypes  
423 evoked by arterial waveforms derived from atherosclerosis-susceptible and -resistant  
424 regions of human vasculature. *Proceedings of the National Academy of Sciences of the*  
425 *United States of America*. 2004;101(41):14871-14876.
- 426 30. Orr AW, Stockton R, Simmers MB, et al. Matrix-specific p21-activated kinase activation  
427 regulates vascular permeability in atherogenesis. *Journal of Cell Biology*.  
428 2007;176(5):719-727.
- 429 31. Jiang F, Dong YM, Wu C, et al. Fine mapping of chromosome 3q22.3 identifies two  
430 haplotype blocks in ESYT3 associated with coronary artery disease in female Han  
431 Chinese. *Atherosclerosis*. 2011;218(2):397-403.
- 432 32. Alshahid M, Wakil SM, Al-Najai M, et al. New susceptibility locus for obesity and  
433 dyslipidaemia on chromosome 3q22.3. *Human Genomics*. 2013;7.
- 434 33. Lettau M, Pieper J, Gerneth A, et al. The adapter protein Nck: Role of individual SH3  
435 and SH2 binding modules for protein interactions in T lymphocytes. *Protein Science*.  
436 2010;19(4):658-669.

- 437 34. Kempiak SJ, Yamaguchi H, Sarmiento C, et al. A neural Wiskott-Aldrich syndrome  
438 protein-mediated pathway for localized activation of actin polymerization that is regulated  
439 by cortactin. *Journal of Biological Chemistry*. 2005;280(7):5836-5842.
- 440 35. Birge RB, Knudsen BS, Besser D, Hanafusa H. SH2 and SH3-containing adaptor  
441 proteins: Redundant or Independent mediators of intracellular signal transduction.  
442 *Genes to Cells*. 1996;1(7):595-613.
- 443 36. Frese S, Schubert WD, Findeis AC, et al. The phosphotyrosine peptide binding  
444 specificity of Nck1 and Nck2 Src homology 2 domains. *Journal of Biological Chemistry*.  
445 2006;281(26):18236-18245.
- 446 37. New LA, Chahi AK, Jones N. Direct Regulation of Nephrin Tyrosine Phosphorylation by  
447 Nck Adaptor Proteins. *Journal of Biological Chemistry*. 2013;288(3):1500-1510.
- 448 38. Kiosses WB, Hood J, Yang SY, et al. A dominant-negative p65 PAK peptide inhibits  
449 angiogenesis. *Circulation Research*. 2002;90(6):697-702.
- 450 39. Reutershan J, Stockton R, Zarbock A, et al. Blocking p21-activated kinase reduces  
451 lipopolysaccharide-induced acute lung injury preventing polymorphonuclear leukocyte  
452 infiltration. *American Journal of Respiratory and Critical Care Medicine*.  
453 2007;175(10):1027-1035.
- 454 40. Orr AW, Hahn C, Blackman BR, Schwartz MA. p21-activated kinase signaling  
455 regulates oxidant-dependent NF-kappa B activation by flow. *Circulation Research*.  
456 2008;103(6):671-679.
